# Supplementary material for: Cooking inspired tough, adhesive, and low-temperature tolerant gluten-based organohydrogels for high performance strain sensors
Source: Royal Society of Chemistry journal article supplement (doi:10.1039/d1ta07273k), 2021-01-01
Supplement: d1ta07273k1.pdf [file d1ta07273k1.pdf]

# Cooking Inspired Tough, Adhesive, and Low-temperature Tolerant Gluten-based Organohydrogels for High Performance Strain Sensors

Hang Xu<sup>a,b</sup>, Xuya Jiang<sup>a,b</sup>, Xiangsheng Han<sup>a,b\*</sup>, Hongzhen Cai<sup>a,b\*</sup>, Feng Gao<sup>c</sup>

<sup>a</sup>School of Agricultural Engineering and Food Science, Shandong University of Technology, Zibo, 255000, China

<sup>b</sup>Shandong Research Center of Engineering and Technology for Clean Energy, Zibo, 255000, China

<sup>c</sup>Zibo Energy Research Institute, Zibo, 255000, China

\*Corresponding author. E-mail address: [hanxs@sdut.edu.cn](mailto:hanxs@sdut.edu.cn) (X. Han); [chzh@sdut.edu.cn](mailto:chzh@sdut.edu.cn) (H. Cai)

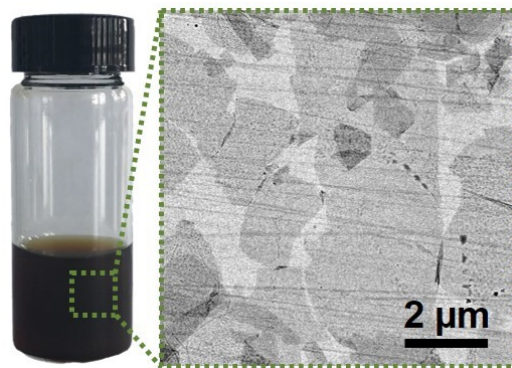

**Figure S1.** Photograph of GO dispersion and TEM image of GO nanosheets.

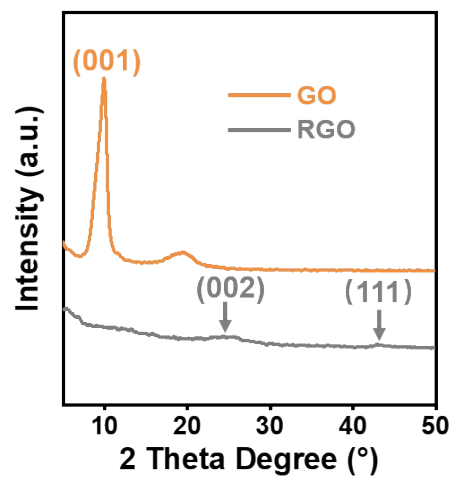

**Figure S2.** The XRD patterns of GO and RGO.

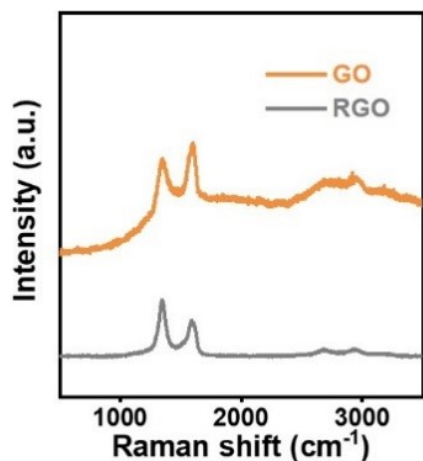

**Figure S3.** The Raman spectra of GO and RGO. The intensity ratio of  $I_D/I_G$  increased from 0.92 of GO to 1.75 of RGO, which was ascribed to the removal of oxygen-containing group of GO and indicated the successful reduction of GO into RGO.

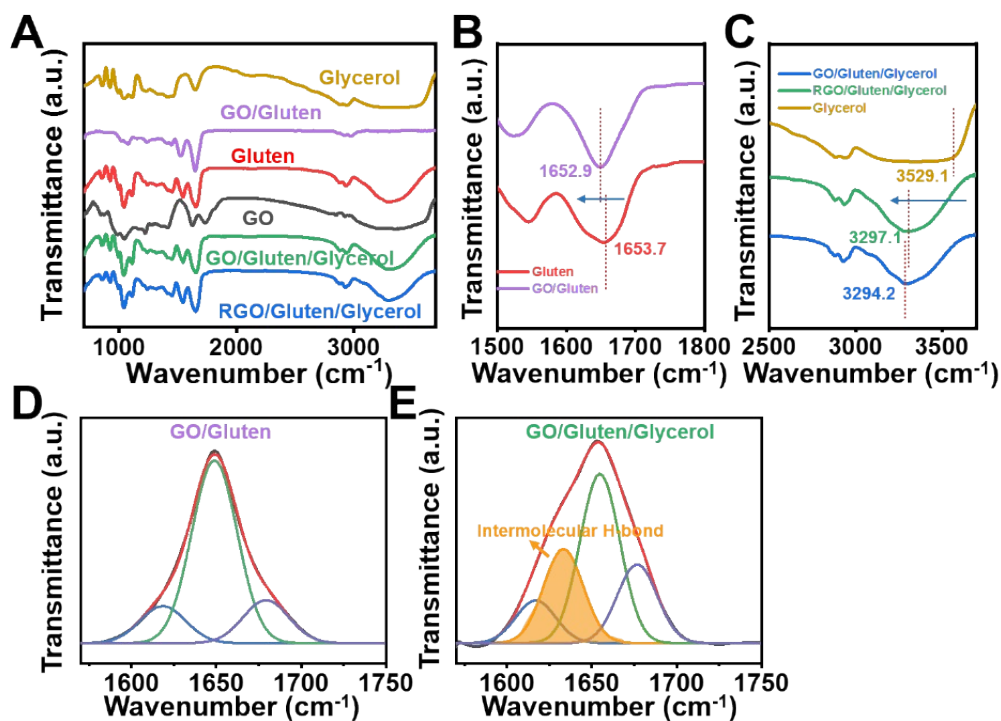

**Figure S4.** (A) The FTIR spectra of GO, Gluten, Glycerol, GO/Gluten, GO/Gluten/Glycerol, and RGO/Gluten/Glycerol. (B-C) Magnified FT-IR spectra in the range of (B) 1500-1800  $\text{cm}^{-1}$  and (C) 2500-3700  $\text{cm}^{-1}$ . (D-E) The fitted FT-IR spectra of GO/Gluten and GO/Gluten/Glycerol.

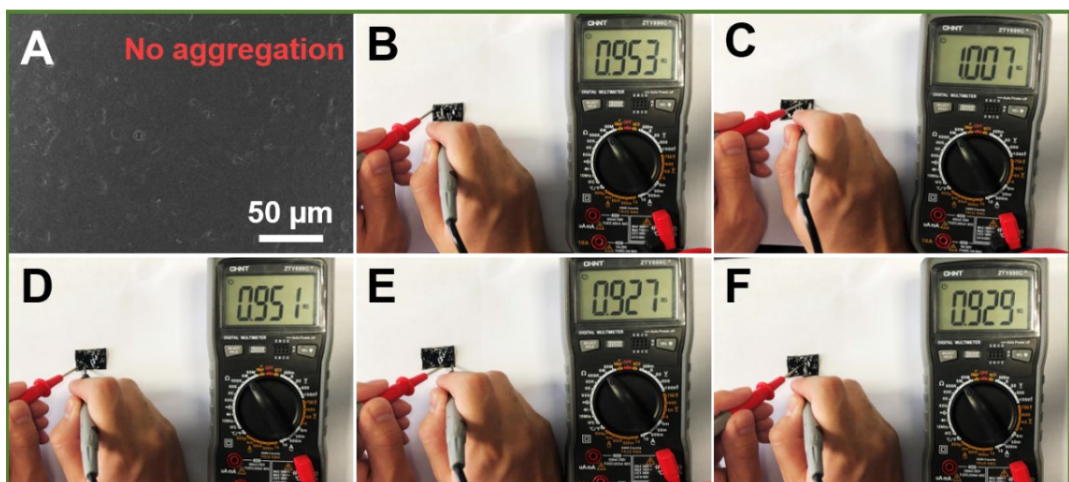

**Figure S5.** (A) The low-magnification SEM image of GGOH<sub>0.2</sub>. (B-F) The conductivities of GGOH<sub>0.2</sub> at different areas indicating the uniform dispersion of RGO in organohydrogels.

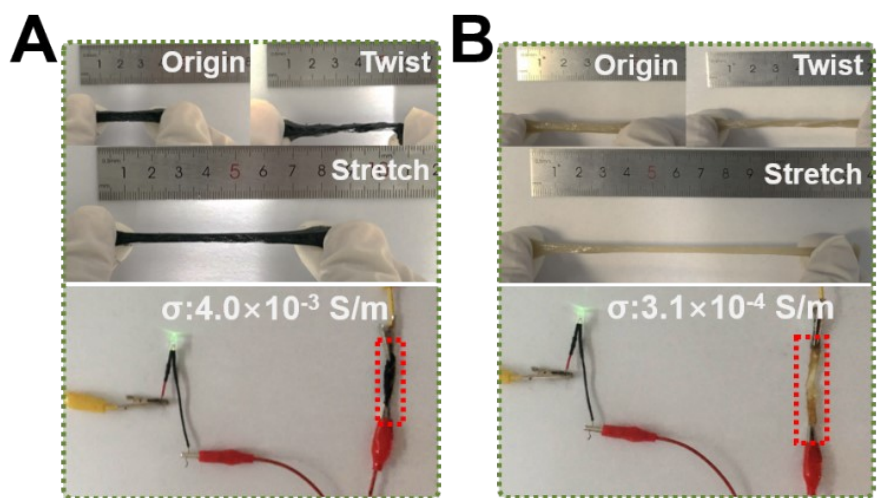

**Figure S6.** (A-B) The photographs of original, twisting, stretching, and conductive (A) gluten/carbon nanotubes/glycerol and (B) gluten/silver nanowires/glycerol composite organohydrogels.

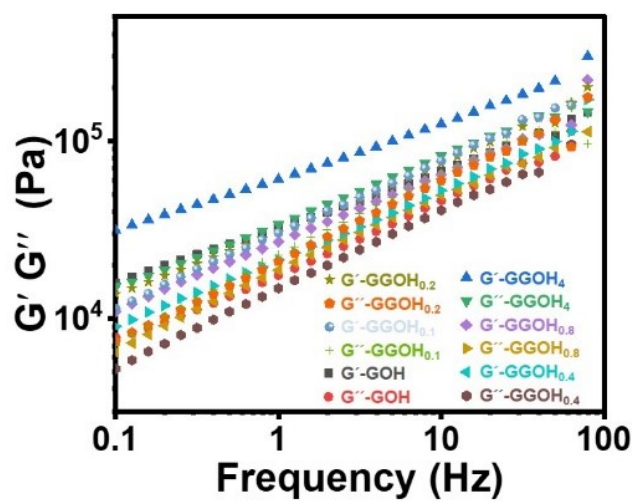

**Figure S7.** The storage modulus and loss modulus *versus* frequency for the GGOH<sub>x</sub> organohydrogels with different RGO concentrations.

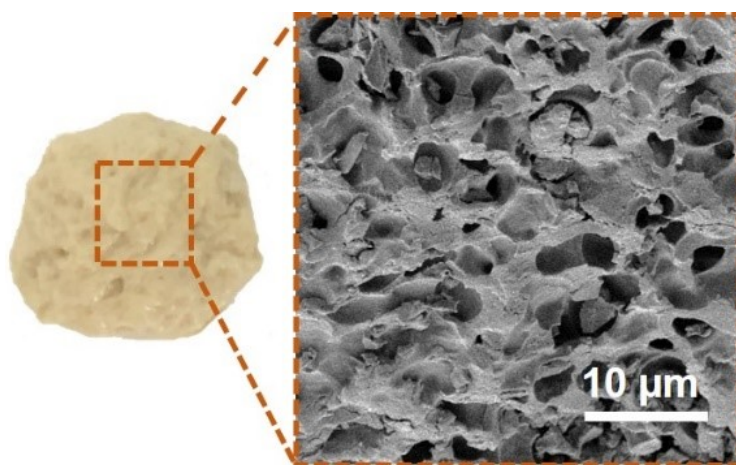

**Figure S8.** The photograph and SEM image of pure gluten derived from wheat flour dough.

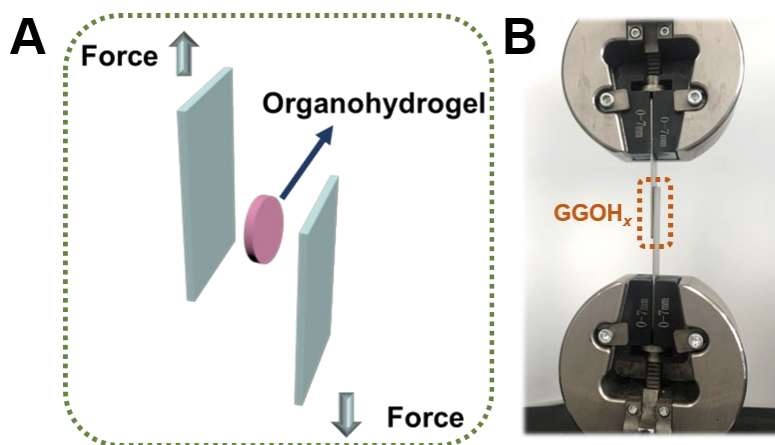

**Figure S9.** (A-B) Schematic illustration and photograph of the lap-shear measurement.

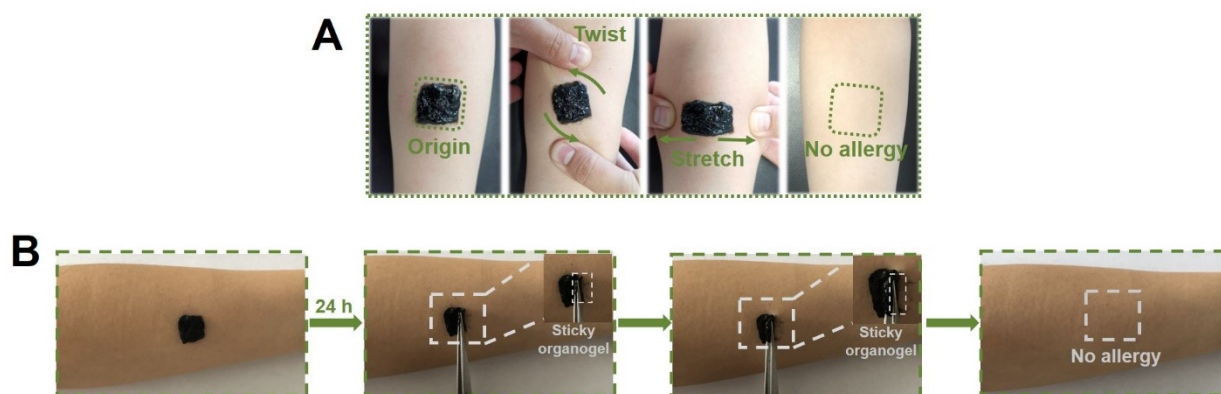

**Figure S10.** (A) Photographs of GGOH<sub>0.2</sub> adhered on human skin indicating the tight and comfortable adhesion. (B)

Photographs of GGOH<sub>0.2</sub> adhered on human skin after 24 h indicating the stable and comfortable adhesion.

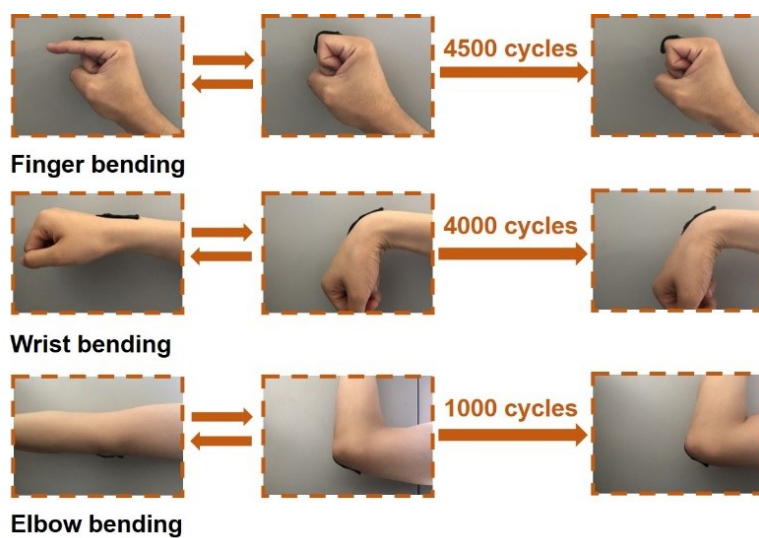

**Figure S11.** The photographs indicating tight adhesion and anti-fatigue capabilities of GGOH<sub>0.2</sub> under different human joints bending cycles.

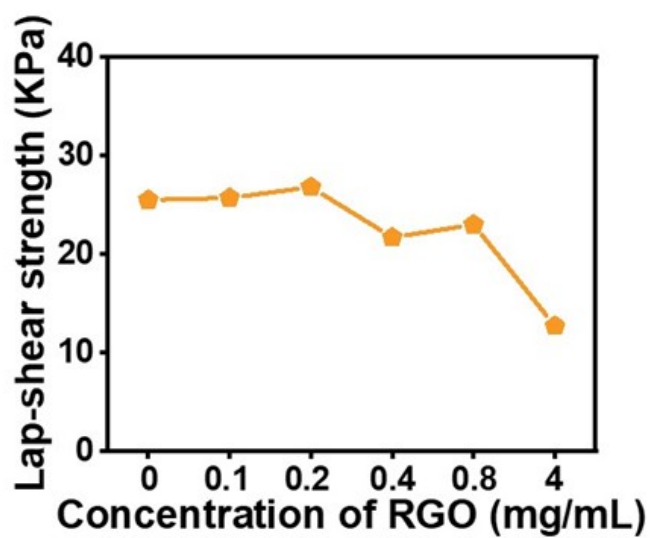

**Figure S12.** The lap-shear strengths of GGOH<sub>x</sub> with different RGO concentrations.

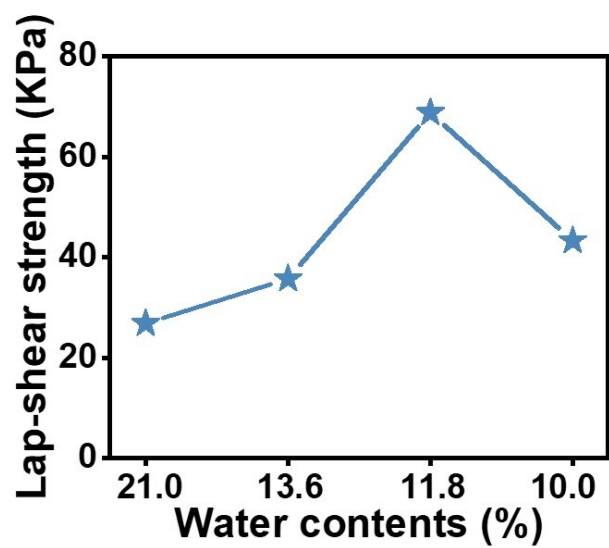

Figure S13. The lap-shear strengths of GGOH<sub>0.2</sub> with various water contents.

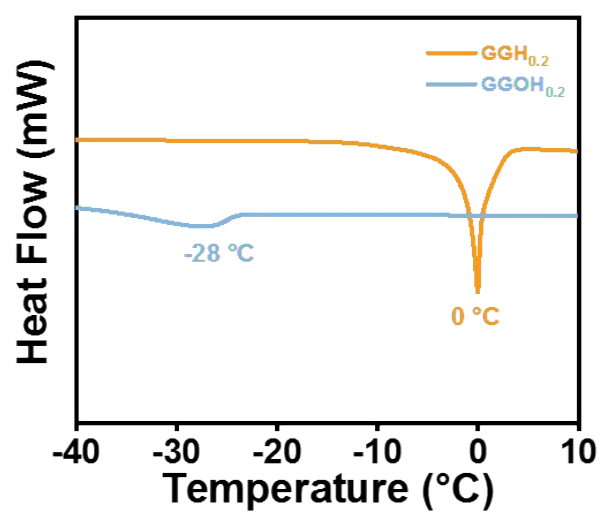

Figure S14. DSC curves of GGOH<sub>0.2</sub> (with glycerol) and GGH<sub>0.2</sub> (without glycerol).

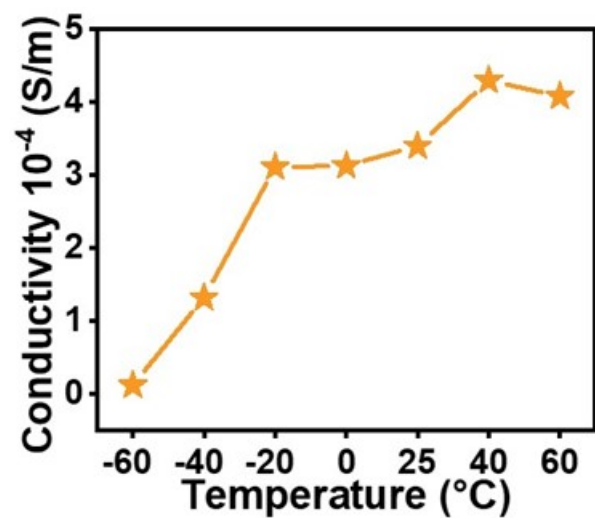

**Figure S15.** The conductivities of  $\text{GGOH}_{0.2}$  versus temperature ranging from  $-60\text{ }^{\circ}\text{C}$  to  $60\text{ }^{\circ}\text{C}$ .

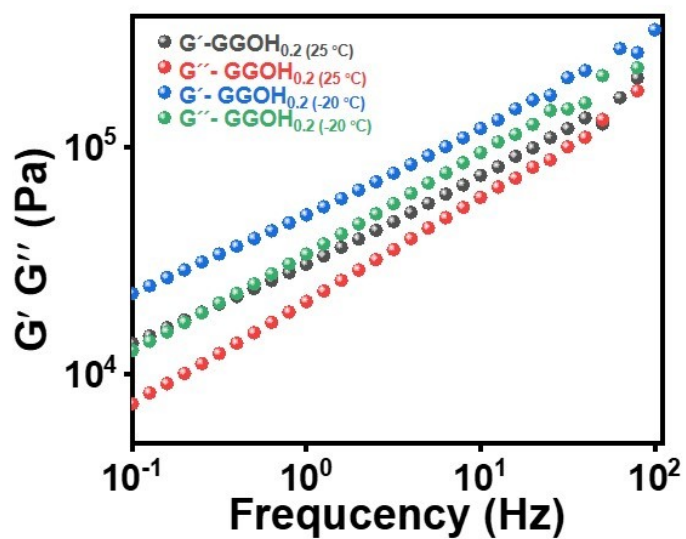

**Figure S16.** The storage modulus and loss modulus of  $\text{GGOH}_{0.2}$  under  $-20\text{ }^{\circ}\text{C}$  and  $25\text{ }^{\circ}\text{C}$ .

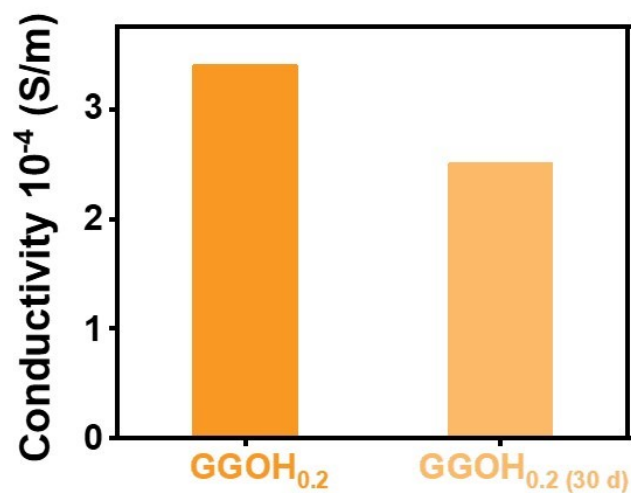

**Figure S17.** The conductivities of GGOH<sub>0.2</sub> before and after storing at 25°C and a relative humidity of ~65 % for 30 days.

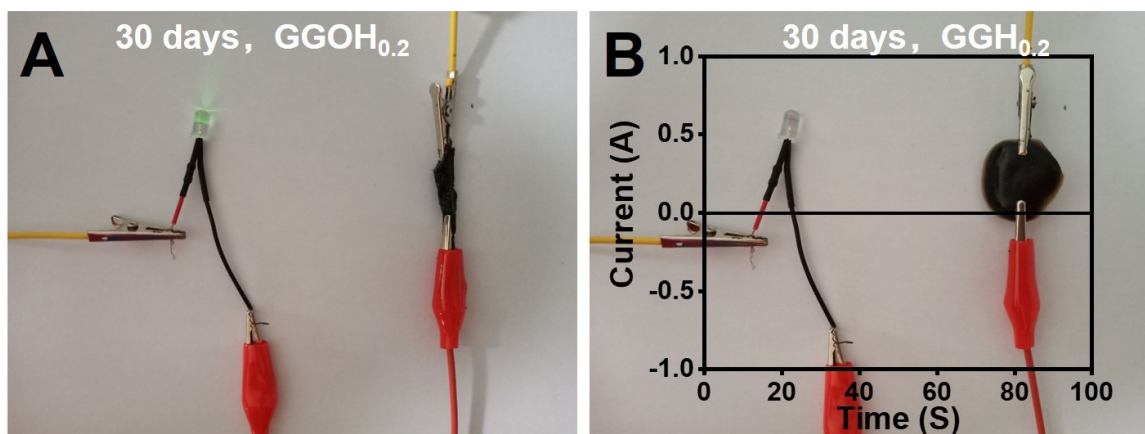

**Figure S18.** (A-B) Circuits consisting of a green LED indicator and GGOH<sub>0.2</sub> or GGH<sub>0.2</sub> that stored at 25°C and a relative humidity of ~65 % for 30 days.

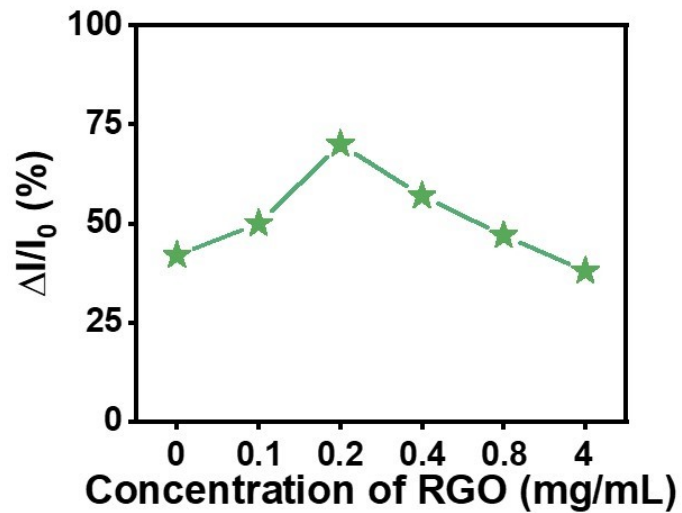

**Figure S19.** The current variations of  $GGOH_x$  at a strain of 80 % with different RGO concentrations.

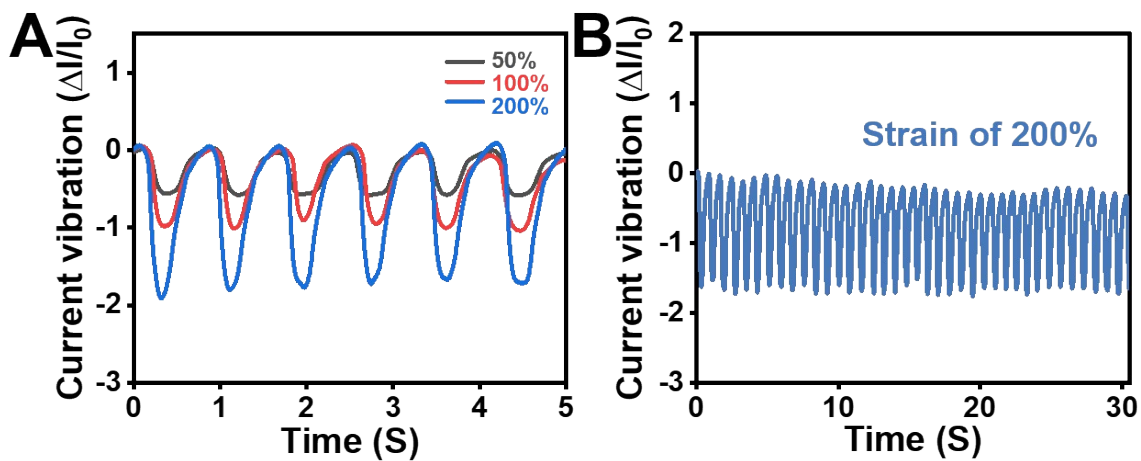

**Figure S20.** (A-B) Multi-cycle tests of relative current variation of the assembled  $GGOH_{0.2}$  strain sensors under strains of 50 %, 100 %, and 200 %.

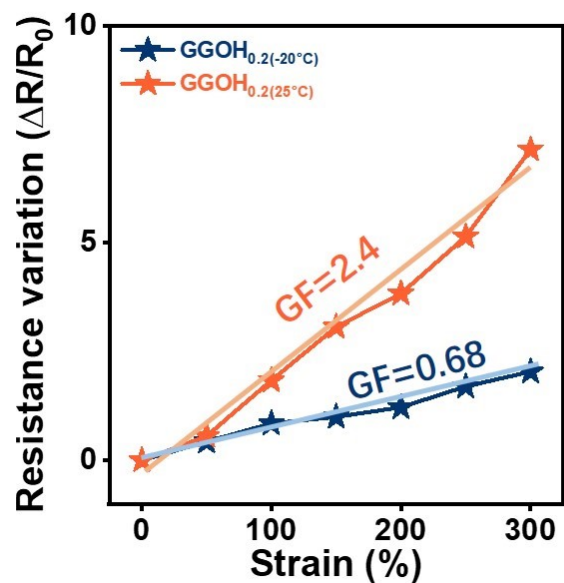

Figure S21. Resistance variations of  $GGOH_{0.2}$  versus strains under  $-20^\circ C$  and  $25^\circ C$ .

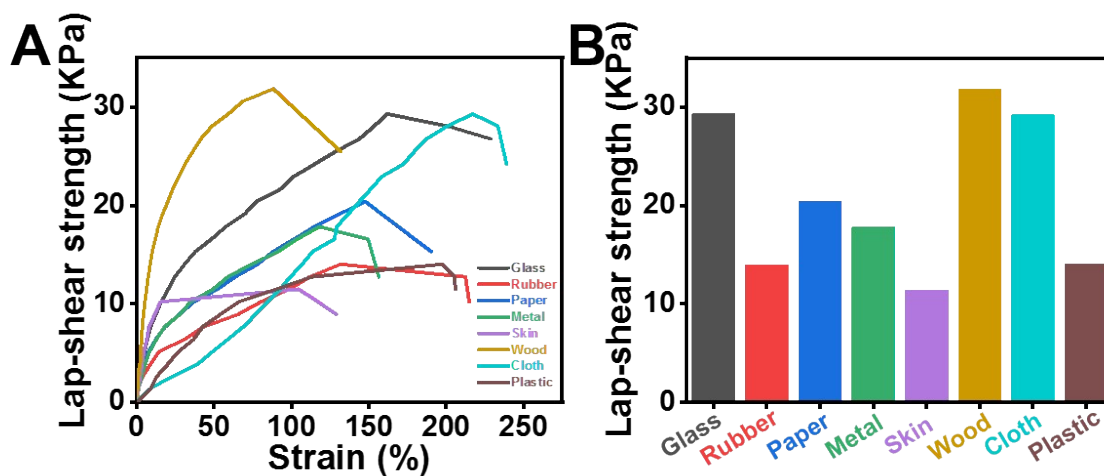

Figure S22. (A-B) Representative curves of lap-shear strengths versus strain for  $GGOH_{0.2}$  with different substrates (glass, rubber, paper, metal, skin, wood, cloth, and plastic) under  $-20^\circ C$ .

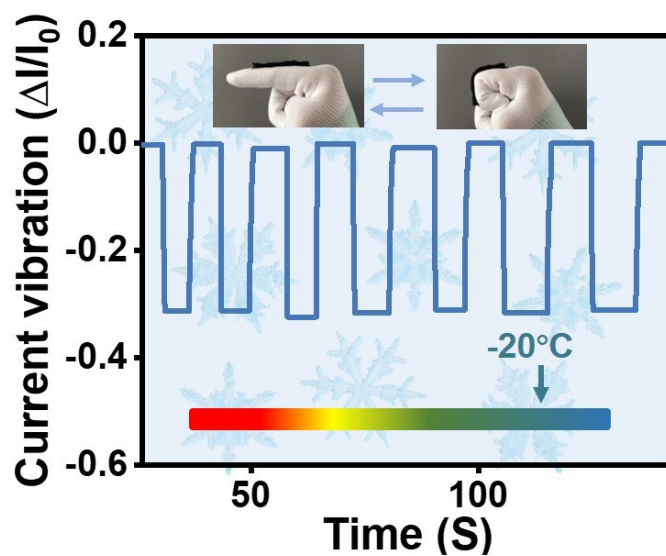

**Figure S23.** Cyclic tests on the detection of finger bending at a bending angle of 90° under -20 °C.

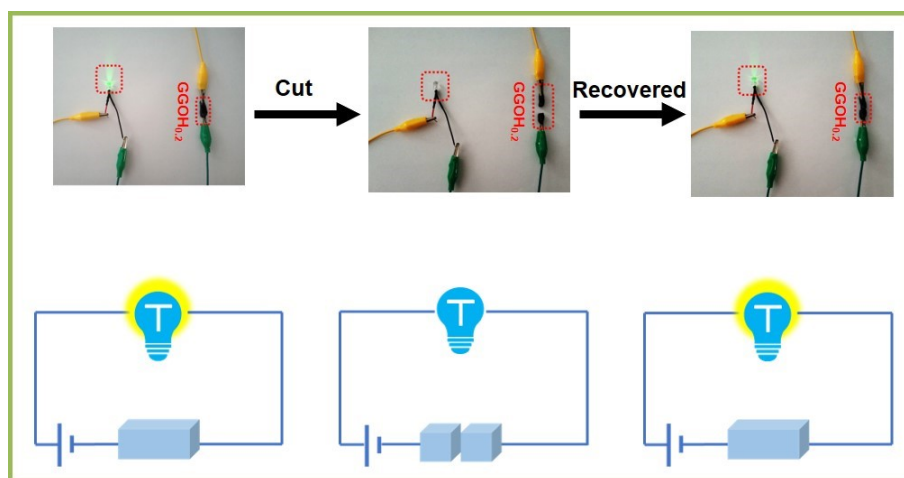

**Figure S24.** Circuits consisting of a green LED indicator and original GGOH<sub>0.2</sub>, cut GGOH<sub>0.2</sub>, and self-recovered GGOH<sub>0.2</sub>. The corresponding schematic diagrams of these circuits also provided.

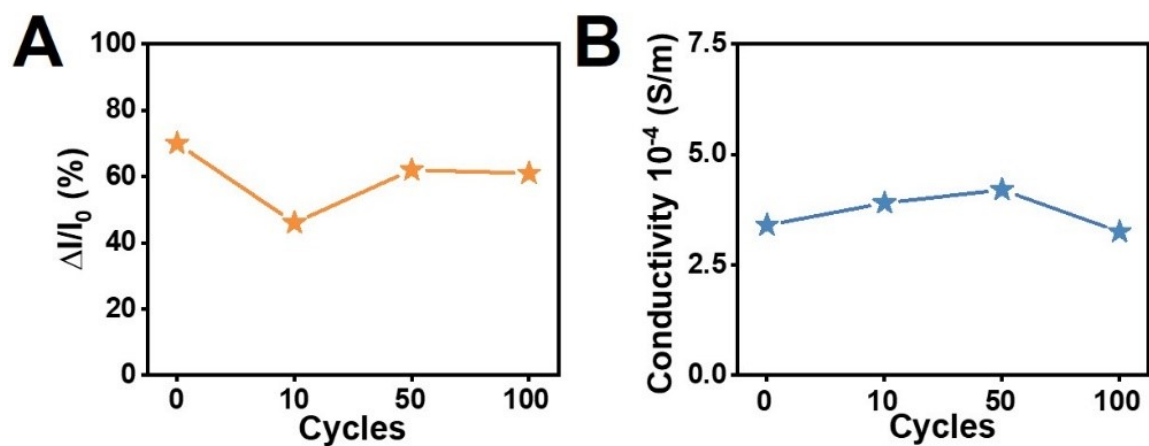

**Figure S25.** The changes of current variations at a strain of 80 % (A) and conductivities (B) of GGOH<sub>0.2</sub> after different self-recovery cycles.

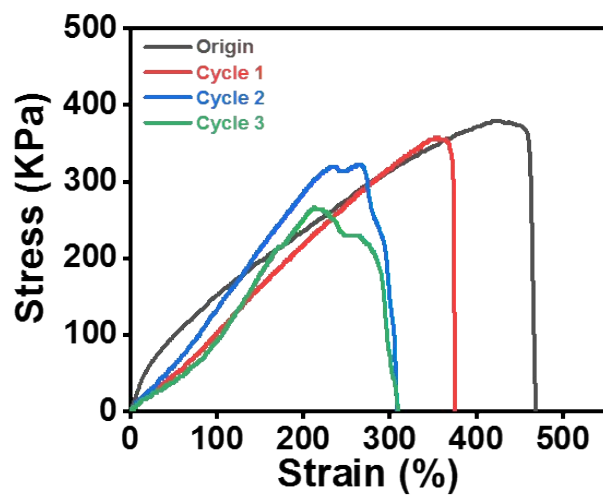

**Figure S26.** Typical stress-strain curves of GGOH<sub>0.2</sub> under different cutting-healing cycles.

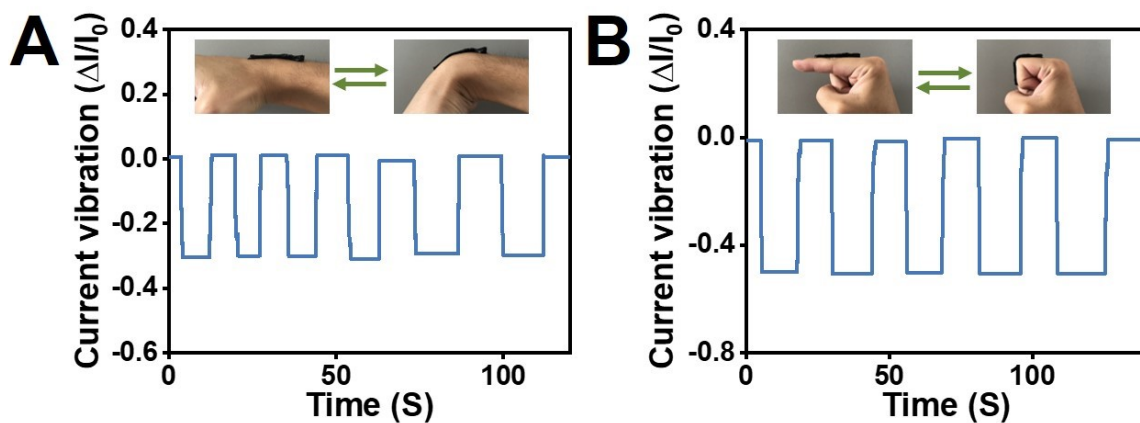

**Figure S27.** The detection of wrist (A) and finger (B) bending using GGOH<sub>0.2</sub> after 100 cutting-recovery cycles.

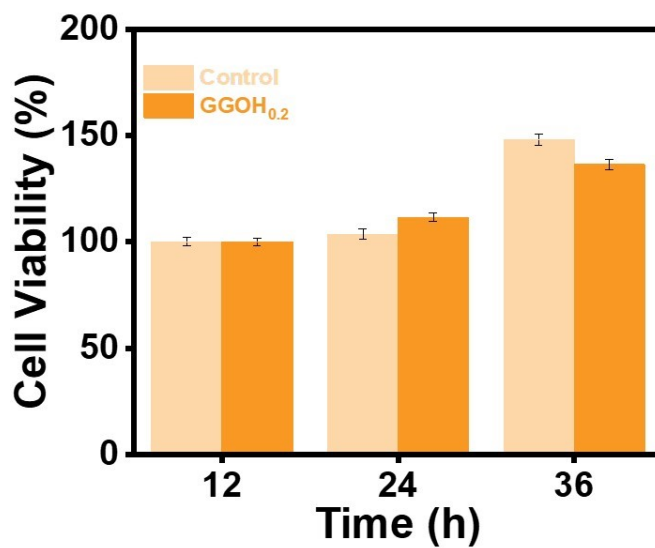

**Figure S28.** Cell viability of HepG2 cells after 12 h, 24 h, 36 h incubation with GGOH<sub>0.2</sub>.

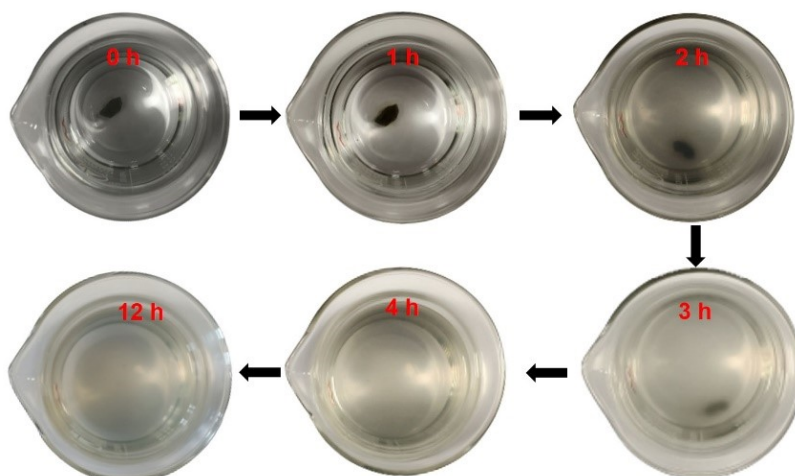

**Figure S29.** Photographs of the degradation of GGOH<sub>0.2</sub> immersed in KOH (1 mol/L) solution at different times.

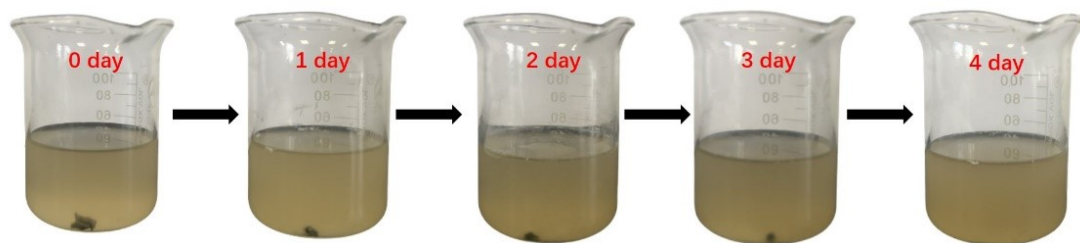

**Figure S30.** Photographs of the degradation of GGOH<sub>0.2</sub> immersed in neutral proteinase (5 mg/mL in PBS) solution at different times.

**Table S1.** The comparison between GGOH<sub>x</sub> and some other biomaterials-based hydrogels for the lap-shear strengths

| Sample                      | Lap-shear strength (KPa) | Toughness (MJ/m <sup>3</sup> ) | Reference |
|-----------------------------|--------------------------|--------------------------------|-----------|
| Gelatin/PAA                 | 26.8                     | 0.24                           | 1         |
| CNF/PAM/PDA                 | 28.1                     | 1.80                           | 2         |
| Lignin/PVA/borax            | 18.7                     | 0.25                           | 3         |
| CNF/PVA/PAM                 | 9.6                      | 0.35                           | 4         |
| CNS/PAM/Ag                  | 17.9                     | 0.96                           | 5         |
| PDA/PVA/graphene            | 22.0                     | 0.20                           | 6         |
| Bentonite/PDA               | 23.4                     | 1.75                           | 7         |
| Chitosan/PF127-CHO          | 6.0                      | 0.008                          | 8         |
| Cellulose/P(DOPMAM-co-MPTC) | 25.0                     | 0.02                           | 9         |
| DNA/PEGDA                   | 9.0                      | 0.10                           | 10        |
| Chitosan/PAM                | 70.0                     | 0.60                           | 11        |
| PDA/CNTs                    | 60.0                     | 0.18                           | 12        |
| GGOH <sub>0.1</sub>         | 53.7                     | 1.07                           | This work |
| GGOH <sub>0.2</sub>         | 68.8                     | 1.14                           | This work |
| GGOH <sub>0.4</sub>         | 49.8                     | 1.83                           | This work |

and toughness.

## References:

1. Z. He and W. Yuan, *ACS Appl. Mater. Inter.*, 2021, **13**, 1474-1485.
2. Z. Shao, X. Hu, W. Cheng, Y. Zhao, J. Hou, M. Wu, D. Xue and Y. Wang, *Nanoscale*, 2020, **12**, 18771-18781.
3. Q. Wang, X. Pan, J. Guo, L. Huang, L. Chen, X. Ma, S. Cao and Y. Ni, *Chem. Eng. J.*, 2021, **414**, 128903.
4. Z. Jin, H. Zhou, J. Lai, X. Jin, H. Liu, P. Wu, W. Chen and A. Ma, *ACS Applied Polymer Materials*, 2021, **3**, 2732-2741.
5. S. Hao, C. Shao, L. Meng, C. Cui, F. Xu and J. Yang, *ACS Appl. Mater. Inter.*, 2020, **12**, 56509-56521.
6. L. Fan, J. Xie, Y. Zheng, D. Wei, D. Yao, J. Zhang and T. Zhang, *ACS Appl. Mater. Inter.*, 2020, **12**, 22225-22236.
7. L. Wu, L. Li, M. Qu, H. Wang and Y. Bin, *ACS Applied Polymer Materials*, 2020, **2**, 3094-3106.
8. J. Qu, X. Zhao, Y. Liang, T. Zhang, P. X. Ma and B. Guo, *Biomaterials*, 2018, **183**, 185-199.
9. S. Lu, X. Zhang, Z. Tang, H. Xiao, M. Zhang, K. Liu, L. Chen, L. Huang, Y. Ni and H. Wu, *Chem. Eng. J.*, 2021, **417**, 129329.
10. D. Wang, J. Cui, M. Gan, Z. Xue, J. Wang, P. Liu, Y. Hu, Y. Pardo, S. Hamada and D. Yang, *Journal of the American Chemical Society*, 2020, **142**, 10114-10124.
11. Y. Cai, J. Qin, W. Li, A. Tyagi, Z. Liu, M. D. Hossain, H. Chen, J.-K. Kim, H. Liu and M. Zhuang, *J. Mater. Chem. A*, 2019, **7**, 27099-27109.
12. L. Han, K. Liu, M. Wang, K. Wang, L. Fang, H. Chen, J. Zhou and X. Lu, *Adv. Funct. Mater.*, 2018, **28**, 1704195.
